# Supplementary material for: Impacts of Groundwater Pumping on Subterranean Microbial Communities in a Deep Aquifer Associated with an Accretionary Prism
Source: MDPI journal article supplement (doi:10.3390/microorganisms12040679), 2024-03-28
Supplement: s1 [file s1]

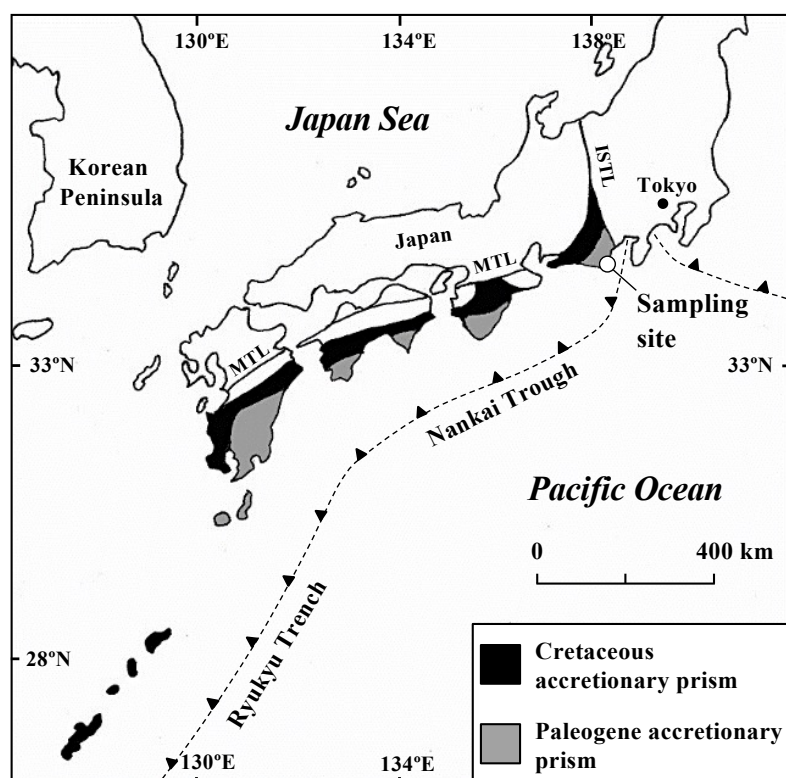

**Figure S1.** Geological map of Southwest Japan. The location of the accretionary prism known as the Shimanto Belt is according to Kano et al. [2]. MTL, Median Tectonic Line; ISTL, Itoigawa-Shizuoka Tectonic Line.

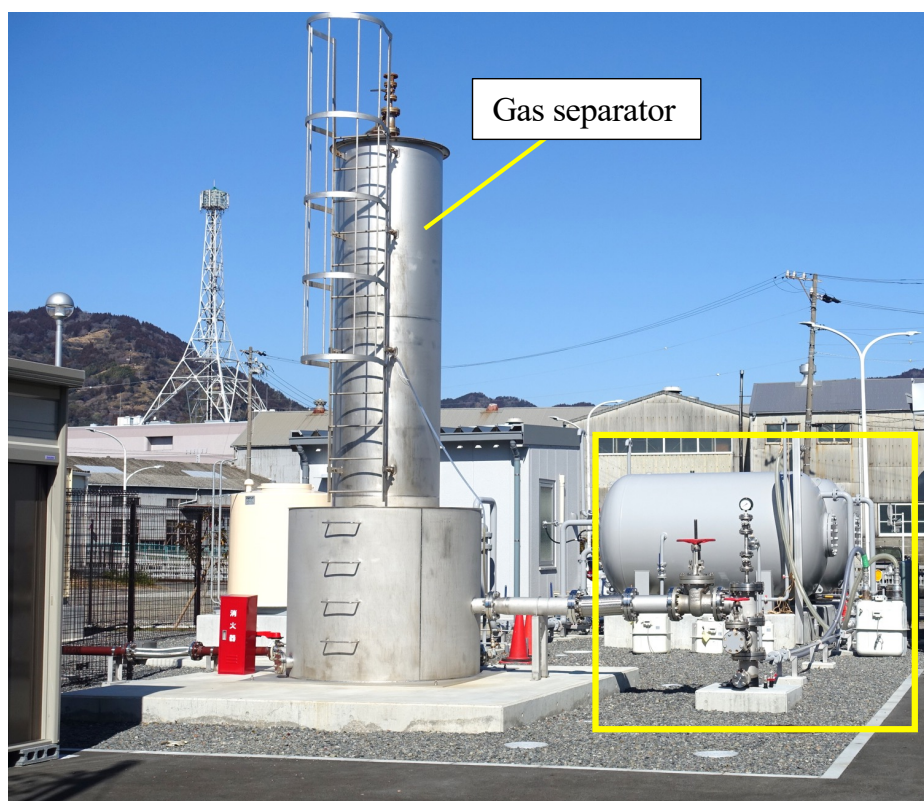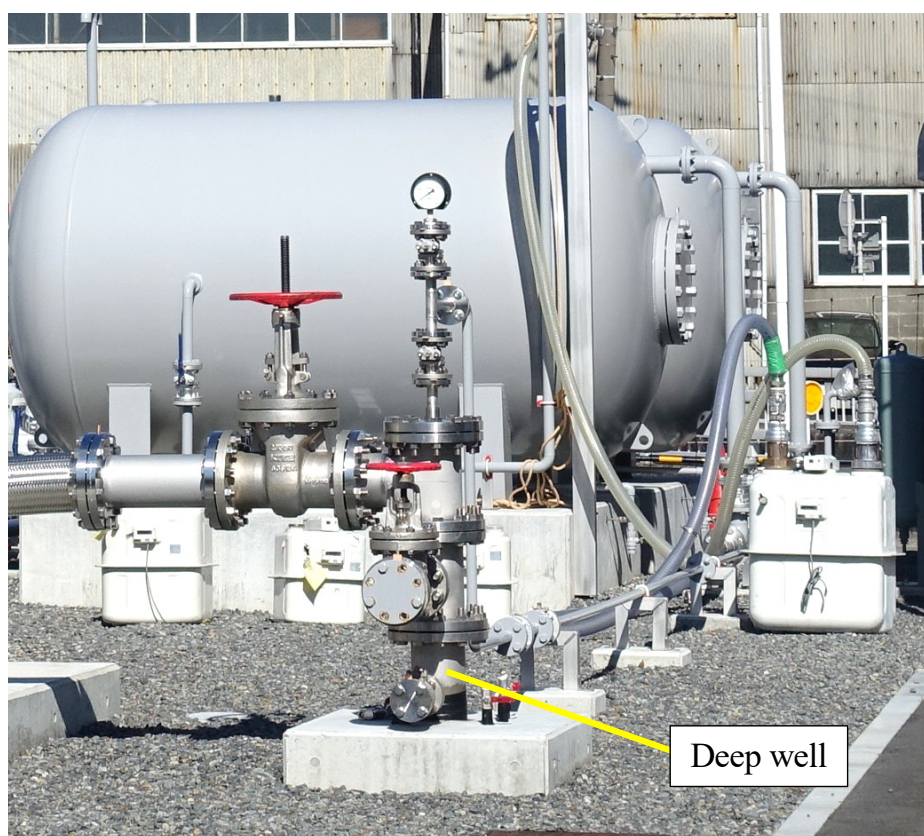

**Figure S2.** Photographs of the deep well “Yaizu Minato no.1 well” located in Shizuoka Prefecture, Japan. The area enclosed in a square indicates the deep well for sample collection.

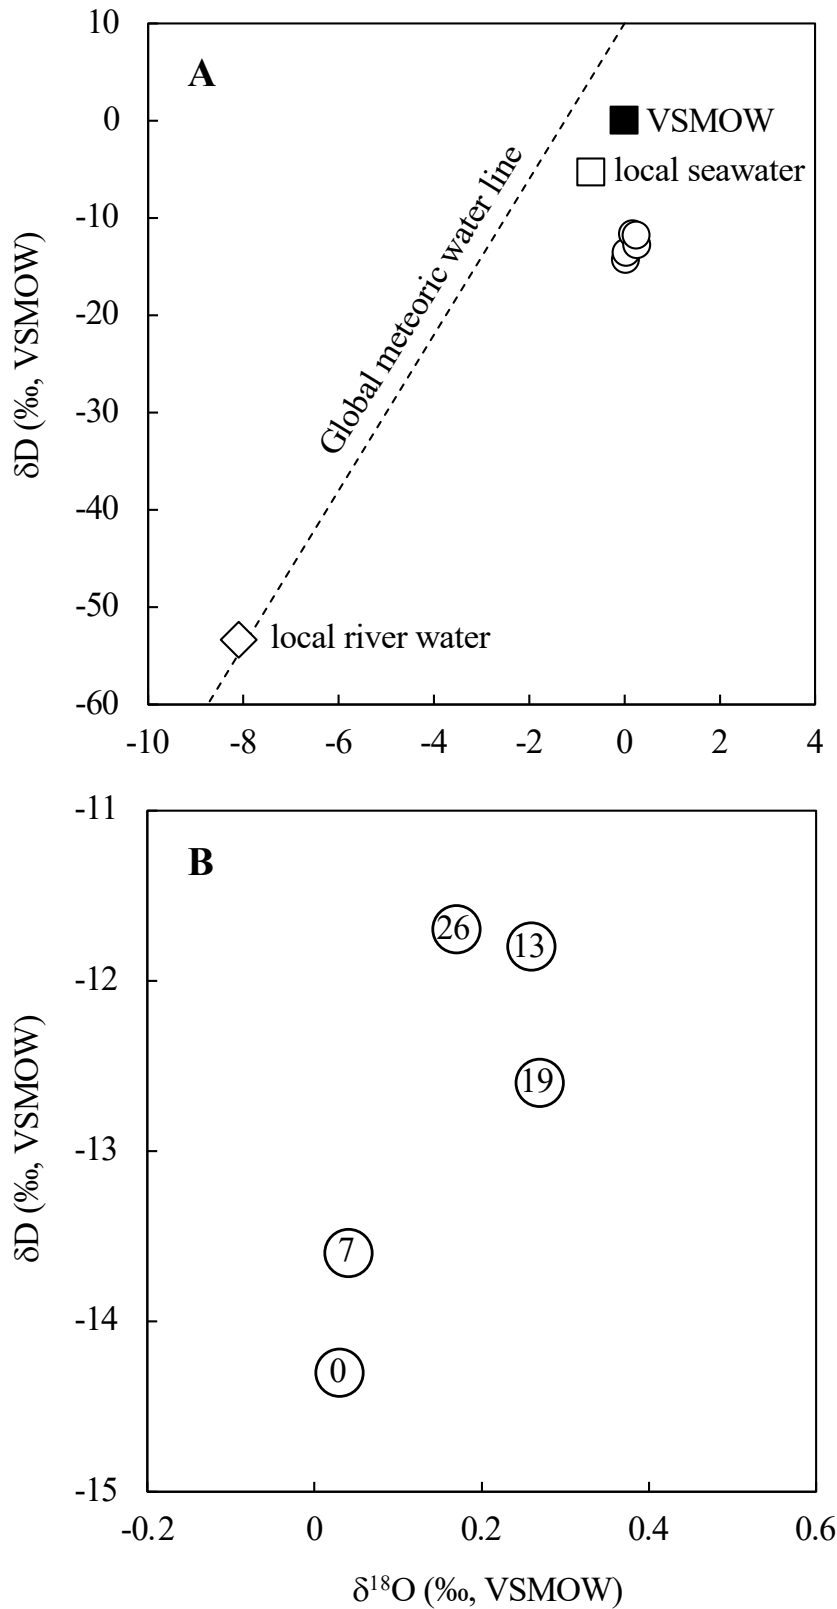

**Figure S3.** (A) Stable hydrogen and oxygen isotopic compositions of the groundwater samples (open circles) along with those of Vienna Standard Mean Ocean Water (VSMOW) (black square), local seawater (open square), and local river water (open diamond). The broken line represents the global meteoric water line [30]. (B) This figure shows the differences in stable hydrogen and oxygen isotope ratios of each sample in detail. The numbers filled in the plots indicate elapsed time (month) since the start of groundwater pumping.

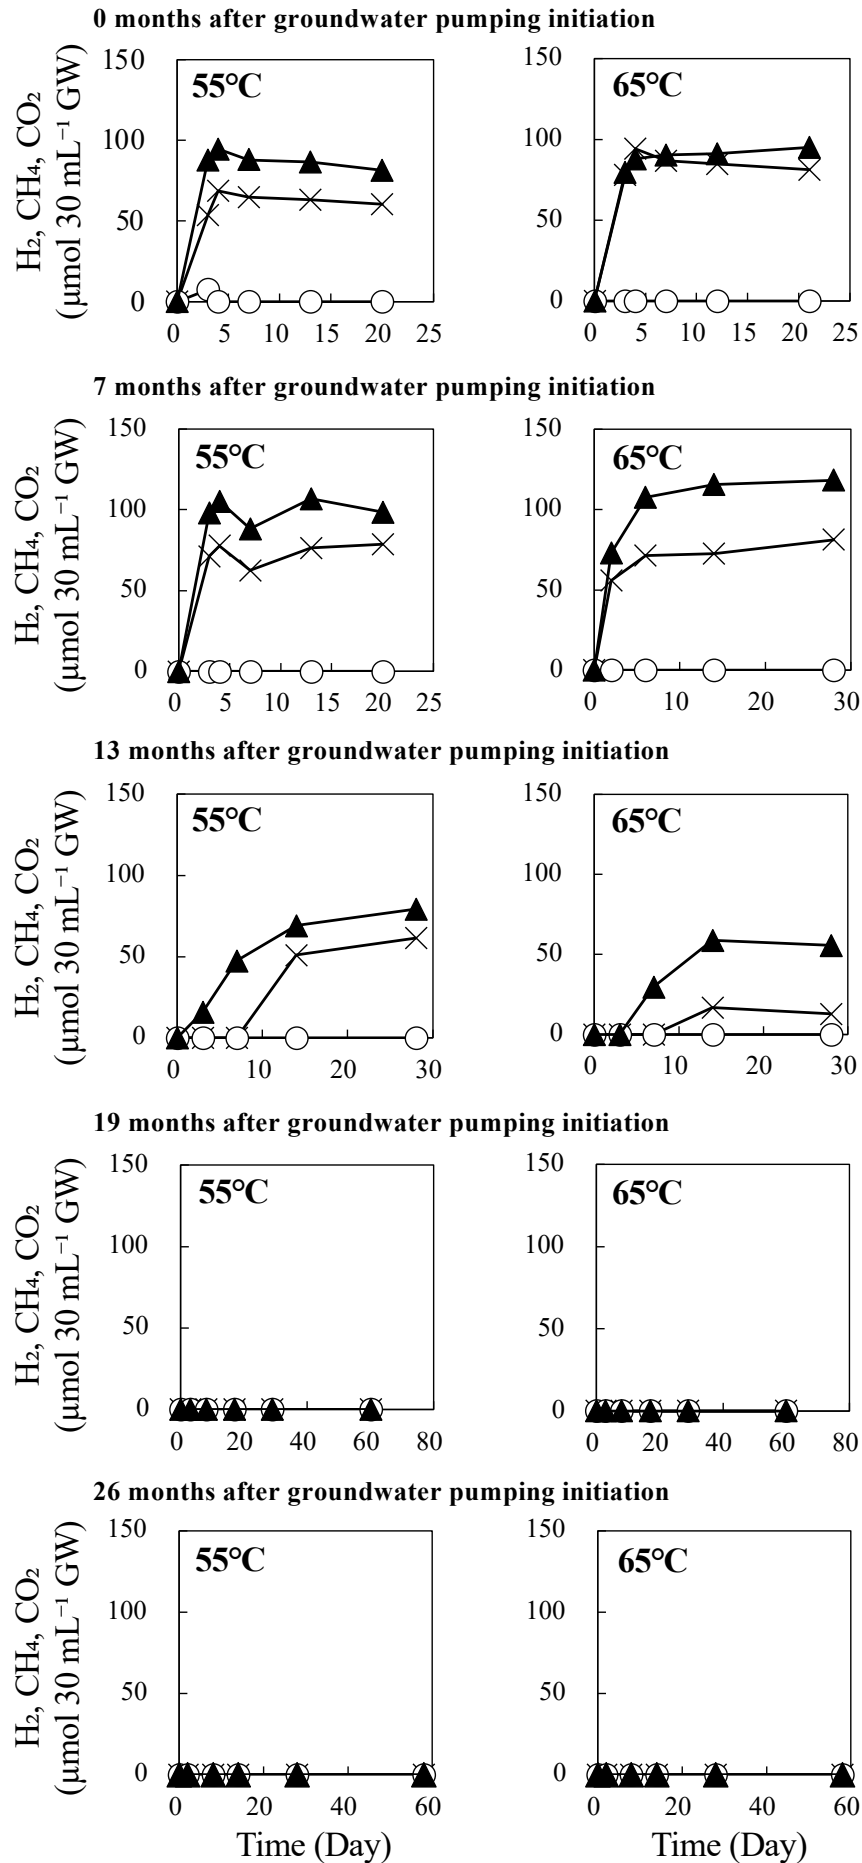

**Figure S4.** Biogas productions from the groundwater (GW) amended with YPG medium. Cumulative measurements in the gas phase of bottled cultures are shown as follows: H<sub>2</sub> (▲); CH<sub>4</sub> (○); CO<sub>2</sub> (×). Incubation temperature is mentioned in the figure.

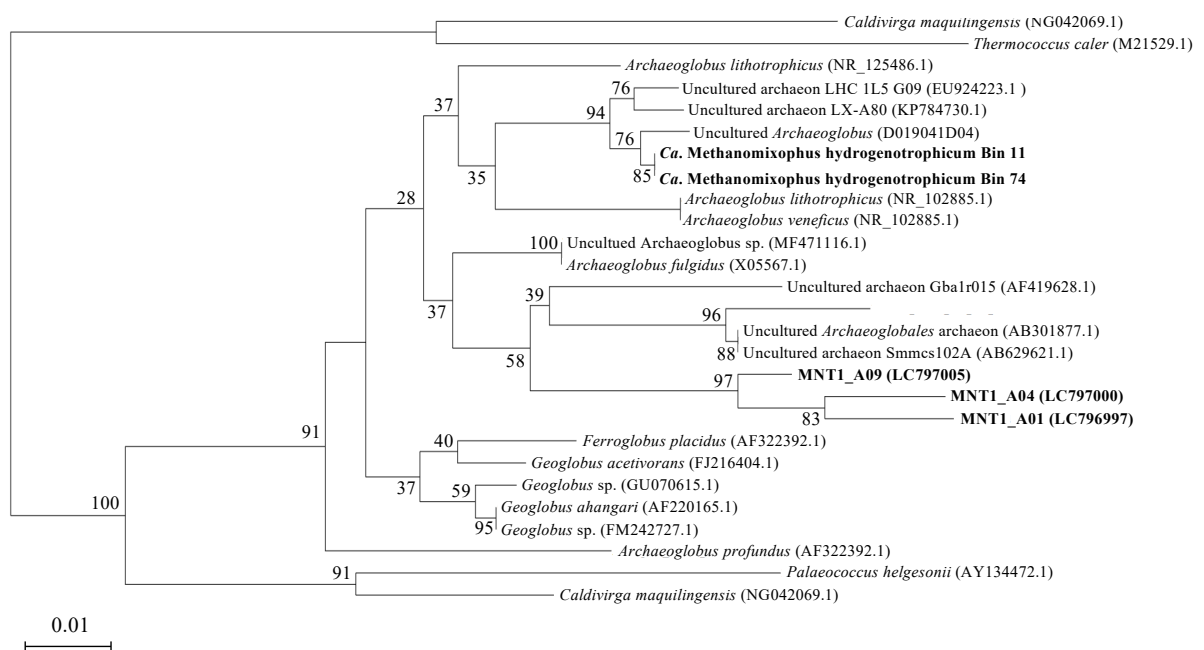

**Figure S5.** Phylogenetic tree based on 16S rRNA gene sequences derived from the groundwater samples. Accession numbers are shown in parentheses. Bootstrap values determined from 1000 iterations are indicated at branching points.

**Table S1.** Primers for PCR used in this study.

| Primer  | Sequences                                                                                                                                    | Target                    | References            |
|---------|----------------------------------------------------------------------------------------------------------------------------------------------|---------------------------|-----------------------|
| 109aF   | 5'-AMD GCT CAG TAA CAC GT-3'                                                                                                                 | Archaeal 16S rRNA gene    | Großkopf et al. [61]  |
| 915aR   | 5'-GTG CTC CCC CGC CAA TTC CT-3'                                                                                                             | Archaeal 16S rRNA gene    | Großkopf et al. [61]  |
| Pro341F | 5'-AAT GAT ACG GCG ACC ACC<br>GAG ATC TAC ACT CTT TCC CTA<br>CAC GAC GCT CTT CCG ATC TCC<br>TAC GGG AGG CAG CAG CCT ACG<br>GGN BGC ASC AG-3' | Prokaryotic 16S rRNA gene | Takahashi et al. [20] |
| Pro805R | 5' -CAA GCA GAA GAC GGC ATA<br>CGA GAT NNN NNN GTG ACT GGA<br>GTT CAG ACG TGT GCT CTT CCG<br>ATC TGA CTA CNV GGG TAT CTA<br>ATC C- 3'        | Prokaryotic 16S rRNA gene | Takahashi et al. [20] |

**Table S2.** Chemical characteristic of the groundwater samples and normal seawater (mg L<sup>-1</sup>).

| Chemical property             | 0 months after pumping initiation | 7 months after pumping initiation | 13 months after pumping initiation | 19 months after pumping initiation | 26 months after pumping initiation | Normal Seawater <sup>3</sup> |
|-------------------------------|-----------------------------------|-----------------------------------|------------------------------------|------------------------------------|------------------------------------|------------------------------|
| Na <sup>+</sup>               | 3,500                             | 3,400                             | 3,200                              | 3,400                              | 3,510                              | 10,781                       |
| Ca <sup>2+</sup>              | 2,700                             | 2,600                             | 2,500                              | 2,600                              | 2,650                              | 412                          |
| Mg <sup>2+</sup>              | 0.5                               | b.d. <sup>2</sup>                 | 0.5                                | b.d. <sup>2</sup>                  | 0.2                                | 1,283                        |
| K <sup>+</sup>                | 23                                | 24                                | 24                                 | 23                                 | 25                                 | 399                          |
| NH <sub>4</sub> <sup>+</sup>  | 6.0                               | 6.9                               | 6.1                                | 6.9                                | 5.4                                | n.a. <sup>4</sup>            |
| Cl <sup>-</sup>               | 9,400                             | 9,400                             | 9,900                              | 9,500                              | 10,000                             | 19,352                       |
| Br <sup>-</sup>               | 35                                | 33                                | 38                                 | 36                                 | 35                                 | 67                           |
| I <sup>-</sup>                | 6.6                               | 6.8                               | 6.8                                | 6.8                                | n.a. <sup>4</sup>                  | 0.05                         |
| F <sup>-</sup>                | b.d. <sup>2</sup>                 | b.d. <sup>2</sup>                 | b.d. <sup>2</sup>                  | b.d. <sup>2</sup>                  | 0.10                               | n.a. <sup>4</sup>            |
| PO <sub>4</sub> <sup>3-</sup> | b.d. <sup>2</sup>                 | b.d. <sup>2</sup>                 | b.d. <sup>2</sup>                  | b.d. <sup>2</sup>                  | b.d. <sup>2</sup>                  | n.a. <sup>4</sup>            |
| NO <sub>3</sub> <sup>-</sup>  | b.d. <sup>2</sup>                 | b.d. <sup>2</sup>                 | b.d. <sup>2</sup>                  | b.d. <sup>2</sup>                  | b.d. <sup>2</sup>                  | n.a. <sup>4</sup>            |
| SO <sub>4</sub> <sup>2-</sup> | b.d. <sup>2</sup>                 | b.d. <sup>2</sup>                 | b.d. <sup>2</sup>                  | b.d. <sup>2</sup>                  | b.d. <sup>2</sup>                  | 2,712                        |
| S <sup>2-</sup>               | b.d. <sup>2</sup>                 | b.d. <sup>2</sup>                 | b.d. <sup>2</sup>                  | b.d. <sup>2</sup>                  | b.d. <sup>2</sup>                  | b.d. <sup>2</sup>            |
| HCO <sub>3</sub> <sup>-</sup> | 20                                | 12                                | 15                                 | 24                                 | 30                                 | 105                          |
| acetate                       | b.d. <sup>2</sup>                 | b.d. <sup>2</sup>                 | b.d. <sup>2</sup>                  | b.d. <sup>2</sup>                  | b.d. <sup>2</sup>                  | n.a. <sup>4</sup>            |
| formate                       | b.d. <sup>2</sup>                 | b.d. <sup>2</sup>                 | b.d. <sup>2</sup>                  | b.d. <sup>2</sup>                  | b.d. <sup>2</sup>                  | n.a. <sup>4</sup>            |
| DOC <sup>1</sup>              | 0.9                               | 1.8                               | 0.9                                | 0.4                                | b.d. <sup>2</sup>                  | 1.4-2.6 <sup>5</sup>         |

<sup>1</sup> DOC: Dissolved organic carbon.<sup>2</sup> b.d.: Below detection limit.<sup>3</sup> Normal seawater data is referred to Millero et al. [62]<sup>4</sup> n.a.: Not analyzed.<sup>5</sup> DOC value in normal seawater is referred to Kimura et al. [63]

**Table S3.** Stable isotopic signature of the groundwater samples.

| Date                               | $\delta D$<br>(‰, VSMOW <sup>1</sup> ) | $\delta^{18}O$<br>(‰, VSMOW <sup>1</sup> ) |
|------------------------------------|----------------------------------------|--------------------------------------------|
| 0 months after pumping initiation  | -14.3                                  | 0.03                                       |
| 7 months after pumping initiation  | -13.6                                  | 0.04                                       |
| 13 months after pumping initiation | -11.7                                  | 0.17                                       |
| 19 months after pumping initiation | -12.8                                  | 0.27                                       |
| 26 months after pumping initiation | -11.8                                  | 0.26                                       |

<sup>1</sup>VSMOW: Vienna Standard Mean Ocean Water.



**Table S4.** Number of prokaryotic 16S rRNA gene sequences derived from the groundwater samples and statistical estimators.

| Date                               | Total of reads | No. of OTUs <sup>1</sup> | Coverage (%) | Chao 1 | ACE | Shannon index | Simpson index |
|------------------------------------|----------------|--------------------------|--------------|--------|-----|---------------|---------------|
| 0 months after pumping initiation  | 13,936         | 152                      | 99.8         | 176    | 185 | 4.73          | 0.932         |
| 7 months after pumping initiation  | 32,232         | 262                      | 99.7         | 456    | 431 | 4.29          | 0.908         |
| 13 months after pumping initiation | 21,486         | 378                      | 99.5         | 550    | 532 | 5.32          | 0.944         |
| 19 months after pumping initiation | 20,436         | 465                      | 99.6         | 680    | 660 | 4.85          | 0.918         |
| 26 months after pumping initiation | 11,653         | 419                      | 98.5         | 858    | 848 | 5.24          | 0.932         |

<sup>1</sup> OTUs: operational taxonomic units.

**Table S5.** Archaeal 16S rRNA gene sequences derived from the groundwater samples.

| OTU <sup>1</sup>                   | No. of clones | Phylogenetic order        | Closest cultivated species (% identity)            |
|------------------------------------|---------------|---------------------------|----------------------------------------------------|
| 0 months after pumping initiation  |               |                           |                                                    |
| MNT1_A02                           | 48            | <i>Methanosarcinales</i>  | <i>Methanotherix harundinacea</i> (88)             |
| MNT1_A03                           | 11            | <i>Thermofilales</i>      | <i>Thermofilum adornatum</i> (84)                  |
| MNT1_A05                           | 4             | <i>Methanobacteriales</i> | <i>Methanobacterium alkalithermotolerans</i> (100) |
| MNT1_A06                           | 4             | <i>Methanobacteriales</i> | <i>Methanothermobacter marburgensis</i> (99)       |
| MNT1_A08                           | 3             | <i>Methanococcales</i>    | <i>Methanotorris igneus</i> (81)                   |
| MNT1_A09                           | 2             | <i>Archaeoglobales</i>    | <i>Archaeoglobus veneficus</i> (92)                |
| MNT1_A07                           | 1             | <i>Thermofilales</i>      | <i>Thermofilum adornatum</i> (85)                  |
| Total                              | 73            | (Coverage = 90.4%)        |                                                    |
| 7 months after pumping initiation  |               |                           |                                                    |
| MNT1_A02                           | 52            | <i>Methanosarcinales</i>  | <i>Methanotherix harundinacea</i> (88)             |
| MNT1_A01                           | 24            | <i>Archaeoglobales</i>    | <i>Archaeoglobus veneficus</i> (91)                |
| MNT1_A03                           | 9             | <i>Thermofilales</i>      | <i>Thermofilum adornatum</i> (84)                  |
| MNT1_A04                           | 3             | <i>Archaeoglobales</i>    | <i>Archaeoglobus veneficus</i> (91)                |
| MNT1_A10                           | 2             | <i>Methanococcales</i>    | <i>Methanocaldococcus lauensis</i> (77)            |
| Total                              | 90            | (Coverage = 94.0%)        |                                                    |
| 13 months after pumping initiation |               |                           |                                                    |
| MNT1_A01                           | 52            | <i>Archaeoglobales</i>    | <i>Archaeoglobus veneficus</i> (91)                |
| MNT1_A02                           | 29            | <i>Methanosarcinales</i>  | <i>Methanotherix harundinacea</i> (88)             |
| MNT1_A04                           | 9             | <i>Archaeoglobales</i>    | <i>Archaeoglobus veneficus</i> (91)                |
| MNT1_A03                           | 2             | <i>Thermofilales</i>      | <i>Thermofilum adornatum</i> (84)                  |
| Total                              | 92            | (Coverage = 95.6%)        |                                                    |
| 19 months after pumping initiation |               |                           |                                                    |
| MNT1_A01                           | 53            | <i>Archaeoglobales</i>    | <i>Archaeoglobus veneficus</i> (91)                |
| MNT1_A02                           | 17            | <i>Methanosarcinales</i>  | <i>Methanotherix harundinacea</i> (88)             |
| MNT1_A04                           | 14            | <i>Archaeoglobales</i>    | <i>Archaeoglobus veneficus</i> (91)                |
| MNT1_A03                           | 1             | <i>Thermofilales</i>      | <i>Thermofilum adornatum</i> (84)                  |
| Total                              | 85            | (Coverage = 95.3%)        |                                                    |
| 26 months after pumping initiation |               |                           |                                                    |
| MNT1_A01                           | 36            | <i>Archaeoglobales</i>    | <i>Archaeoglobus veneficus</i> (91)                |
| MNT1_A04                           | 35            | <i>Archaeoglobales</i>    | <i>Archaeoglobus veneficus</i> (91)                |
| MNT1_A02                           | 16            | <i>Methanosarcinales</i>  | <i>Methanotherix harundinacea</i> (87)             |
| MNT1_A07                           | 2             | <i>Thermofilales</i>      | <i>Thermofilum adornatum</i> (85)                  |
| Total                              | 89            | (Coverage = 95.5%)        |                                                    |

<sup>1</sup> OTU: operational taxonomic unit.
